# Supplementary material for: Impact of Pulsed Electric Field Treatment on the Process Kinetics and Selected Properties of Air and Dehumidified Air-Dried Mushrooms
Source: MDPI journal article supplement (doi:10.3390/pr11072101), 2023-07-14
Supplement: s1 [file s1]

Article

# Impact of Pulsed Electric Field Treatment on the Process Kinetics and Selected Properties of Air and Dehumidified Air-Dried Mushrooms

Magdalena Dadan, Alicja Barańska, Aleksandra Matys, Katarzyna Rybak, Dorota Witrowa-Rajchert, Artur Wiktor, and Małgorzata Nowacka \*

Department of Food Engineering and Process Management, Institute of Food Sciences, Warsaw University of Life Sciences (WULS-SGGW), 02-787 Warsaw, Poland; magdalena\_dadan@sggw.edu.pl (M.D.); alicja\_baranska@sggw.edu.pl (A.B.); aleksandra\_matys@sggw.edu.pl (A.M.); katarzyna\_rybak@sggw.edu.pl (K.R.); dorota\_witrowa\_rajchert@sggw.edu.pl (D.W.-R.); artur\_wiktor@sggw.edu.pl (A.W.)

\* Correspondence: malgorzata\_nowacka@sggw.edu.pl

## Supplementary Materials:

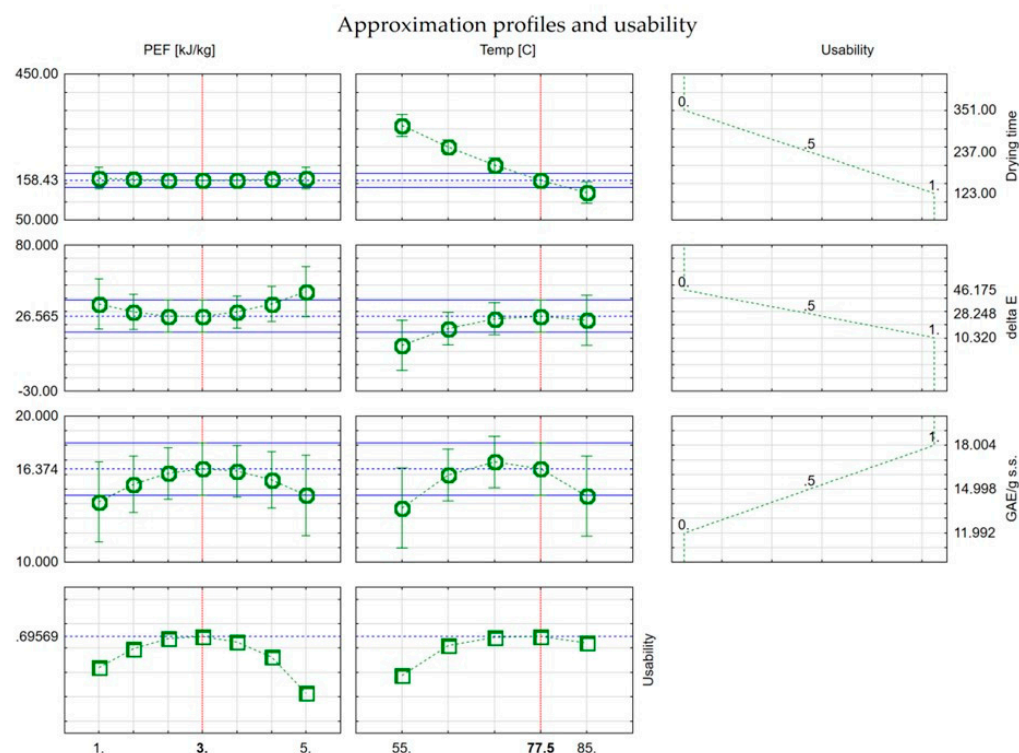

**Figure S1.** Approximation profiles and usability for dried mushrooms obtained using convective method with non-dehumidified air (CD) subjected or not to PEF.

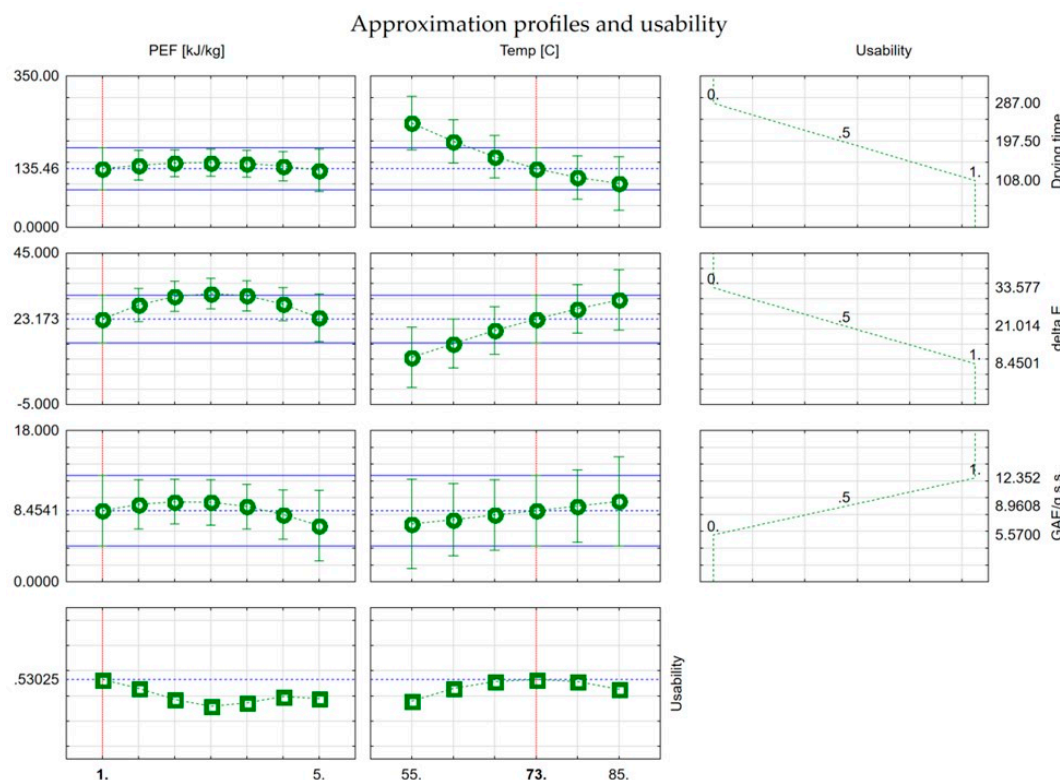

**Figure S2.** Approximation profiles and usability for dried mushrooms obtained using convective method with dehumidified air (DA) subjected or not to PEF.
